# Supplementary material for: Develop machine learning-based regression predictive models for engineering protein solubility
Source: Oxford University Press journal article supplement (doi:10.1093/bioinformatics/btz294), 2019-04-17
Supplement: bioinformatics_35_22_4640_s5.pdf [file bioinformatics_35_22_4640_s5.pdf]

## Supplementary Materials

# Develop machine learning based regression predictive models for engineering protein solubility

## Prediction of protein solubility

### 1 Database

**Table S1.** Summary of 26 proteins excluded

| Name of gene | Reasons for removing                                                            |
|--------------|---------------------------------------------------------------------------------|
| yedM         | There are multiply stop codons in the middle of the sequence.                   |
| rffT         | Two hits were found for the gene name in NCBI.                                  |
| spr          | Two hits were found for the gene name in NCBI.                                  |
| ade          | Six hits were found for the gene name in NCBI.                                  |
| tiaE         | This gene was not from MG1655.                                                  |
| yiaI         | This gene was not from MG1655.                                                  |
| gapC         | There are multiply stop codons in the middle of the sequence.                   |
| ilvG         | There are multiply stop codons in the middle of the sequence.                   |
| ilvG         | There are multiply stop codons in the middle of the sequence.                   |
| insO         | Two hits were found for the gene name in NCBI.                                  |
| phnE         | There are multiply stop codons in the middle of the sequence.                   |
| phnE         | There are multiply stop codons in the middle of the sequence.                   |
| yagP         | Two hits were found for the gene name in NCBI.                                  |
| ybeM         | There are multiply stop codons in the middle of the sequence.                   |
| ycgH         | There are multiply stop codons in the middle of the sequence.                   |
| ydaY         | There are multiply stop codons in the middle of the sequence.                   |
| yjiQ         | There are multiply stop codons in the middle of the sequence.                   |
| yjgX         | There are two proteins with same name and different solubility in the database. |
| yjgX         | There are two proteins with same name and different solubility in the database. |
| gatR         | There are two proteins with same name and different solubility in the database. |
| gatR         | There are two proteins with same name and different solubility in the database. |
| ybfH         | Amino acid X representing undetermined amino acid) appears in the sequence.     |
| yhdW         | Amino acid X representing undetermined amino acid) appears in the sequence.     |
| ymgH         | Amino acid X representing undetermined amino acid) appears in the sequence.     |
| yohG         | Amino acid X representing undetermined amino acid) appears in the sequence.     |
| kdpF         | The sequence is too short to be converted into numerical values by descriptors. |

## 2 SVM tuning

**Table S2.** Performance of SVM for different kernels

| Kernel       | Accuracy | R <sup>2</sup> |
|--------------|----------|----------------|
| linear       | 0.6684   | 0.2240         |
| sigmoid      | 0.4528   | 0.0011         |
| radial basis | 0.7500   | 0.4064         |
| polynomial   | 0.6339   | 0.0732         |

(a)

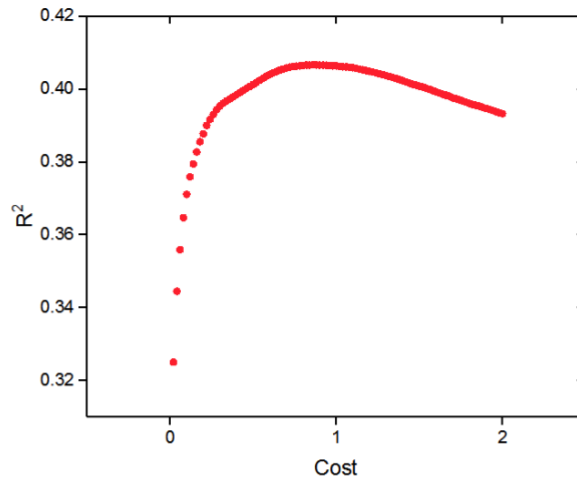

(b)

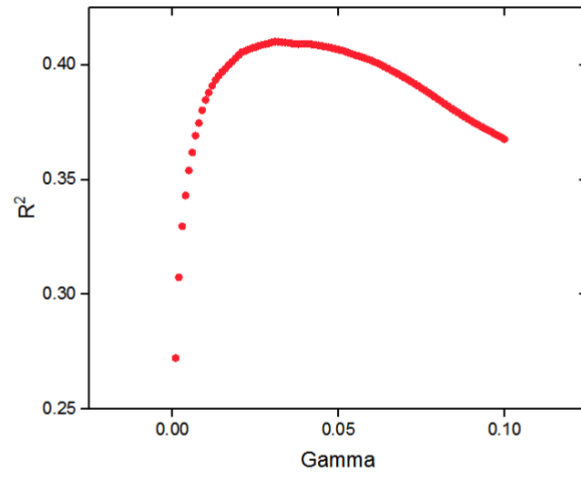

(c)

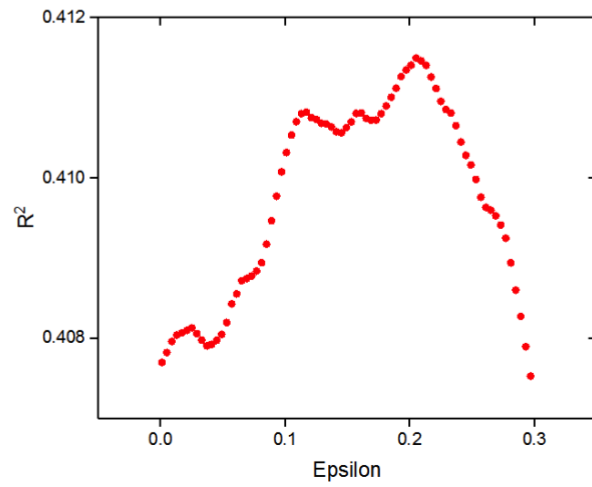

**Fig. S1.** Plot between  $R^2$  of SVM and cost, gamma and epsilon respectively.

### 3 Data augmentation

**Table S3.** Performance of SVM based on data generated from different data augmentation algorithms

| GAN version | R <sup>2</sup> |
|-------------|----------------|
| No GAN      | 0.4092         |
| GANs        | 0.4015         |
| CGAN        | 0.4064         |
| WGAN        | 0.3787         |
| WCGAN       | 0.4003         |

**Table S4.** Performance of SVM based on GANs for 5000 iterations

| GANs version | R <sup>2</sup> |
|--------------|----------------|
| No GANs-1    | 0.4093         |
| GANs-1       | 0.4044         |
| No GANs-2    | 0.4200         |
| GANs-2       | 0.4240         |
| No GANs-3    | 0.4447         |
| GANs-3       | 0.4462         |

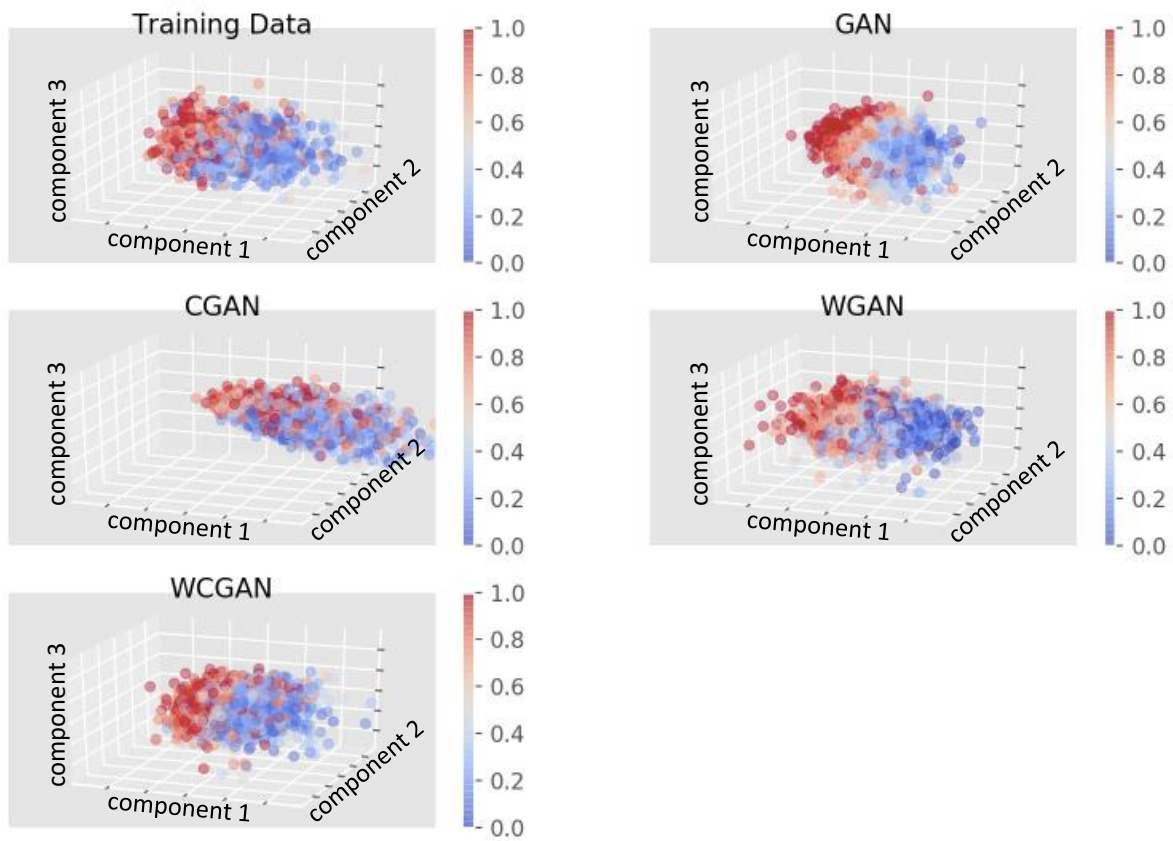

**Fig. S2.** Original data and generated data by different versions of GANs for 500 iterations.

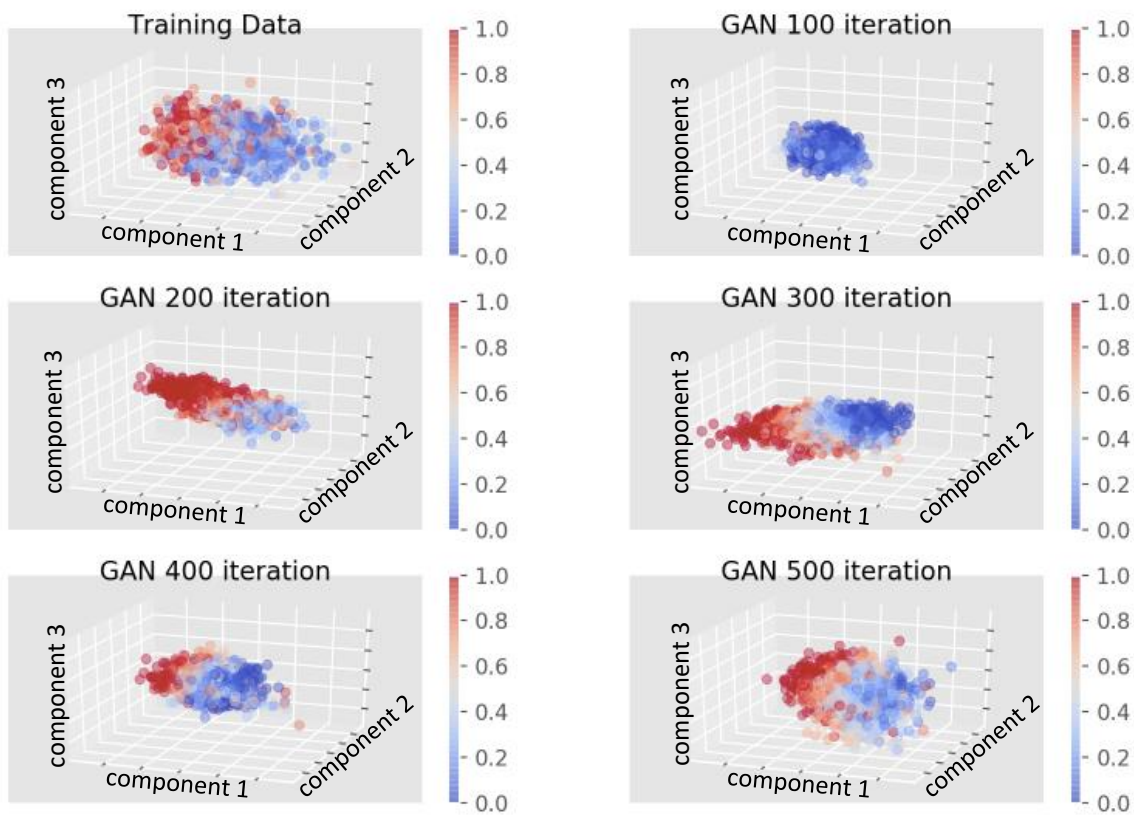

**Fig. S3.** Original data and generated data by GANs model in different steps for 500 iterations
